# Supplementary material
Source: PubMed Central journal article supplement (PMC4576981)
Supplement: embr0016-1114-sd3.pdf [file embr0016-1114-sd3.pdf]

Manuscript EMBOR-2015-40514

## **(Patho-)physiological relevance of PINK1-dependent ubiquitin phosphorylation**

Fabienne C. Fiesel, Maya Ando, Roman Hudec, Anneliese R. Hill, Monica Castanedes-Casey, Thomas R. Caulfield, Elisabeth L. Moussaud-Lamodière, Jeannette N. Stankowski, Peter O. Bauer, Oswaldo Lorenzo-Betancor, Isidre Ferrer, José M. Arbelo, Joanna Siuda, Li Chen, Valina L. Dawson, Ted M. Dawson, Zbigniew K. Wszolek, Owen A. Ross, Dennis W. Dickson, and Wolfdieter Springer

*Corresponding author: Wolfdieter Springer, Mayo Clinic*

---

**Review timeline:**

Submission date:

08 April 2015

Accepted:

25 June 2015

---

Editor: Nonia Pariente

**Transaction Report:**

No Peer-Review Process File is available with this article, as the authors have chosen not to make the review process public in this case.
